# Supplementary material for: MRI/Photoluminescence Dual-Modal Imaging Magnetic PLGA Nanocapsules for Theranostics
Source: MDPI journal article supplement (doi:10.3390/pharmaceutics12010016), 2019-12-21
Supplement: s1 [file s1]

# Supplementary Materials: MRI/Photoluminescence Dual-Modal Imaging Magnetic PLGA Nanocapsules for Theranostics

Yajie Zhang, Miguel García-Gabilondo, Anna Rosell and Anna Roig

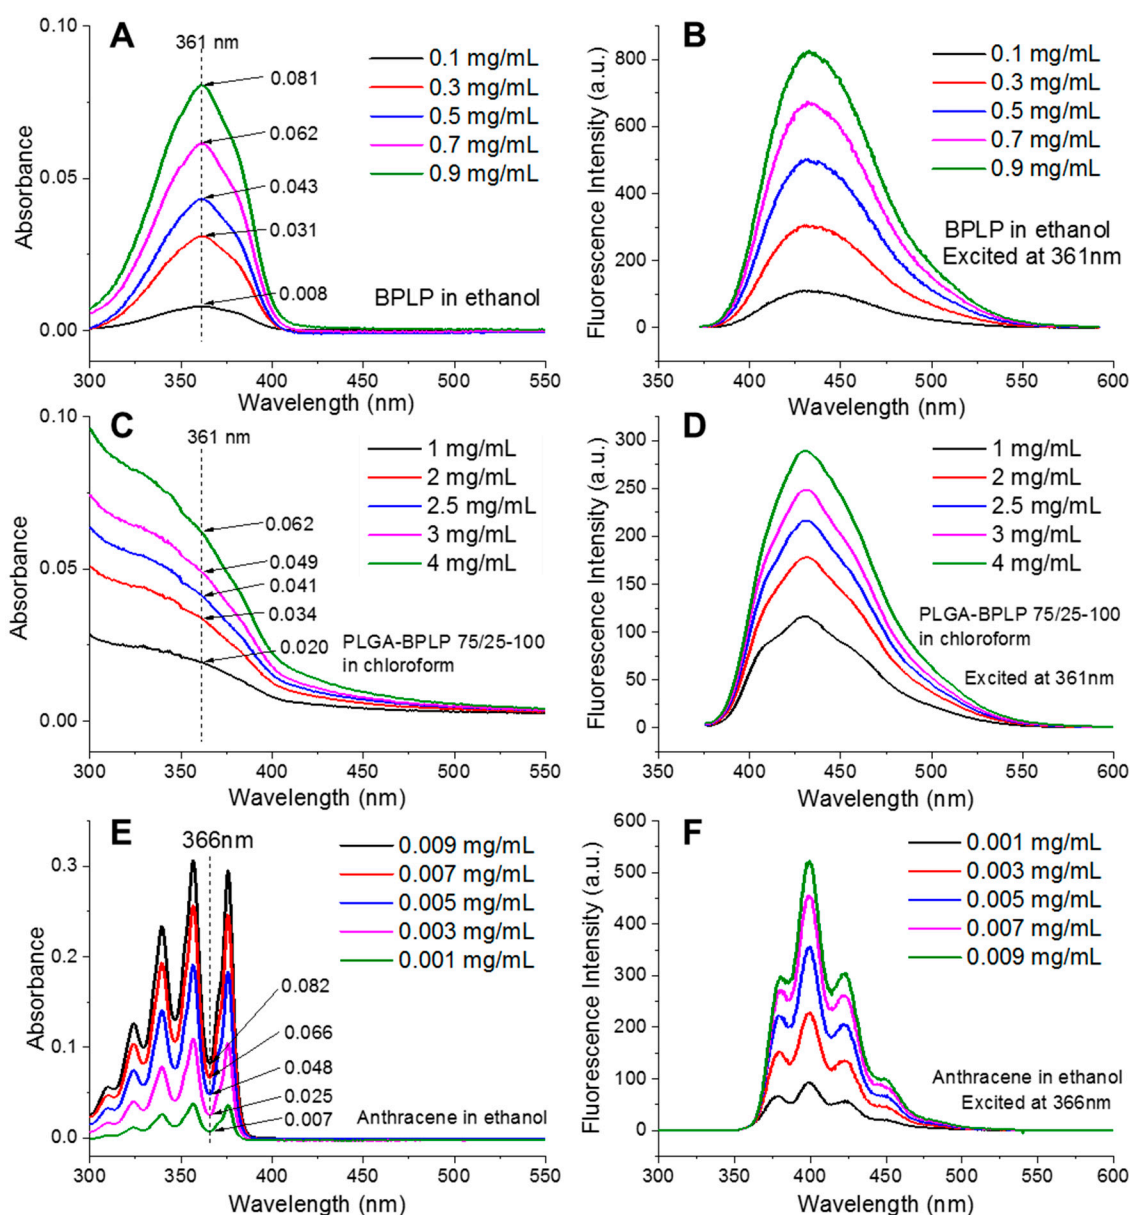

**Figure S1.** UV-Vis absorbance spectra and fluorescence spectra of the as-synthesized A/B) BPLP, C/D) PLGA-BPLP and E/F) reference anthracene at a series concentrations for fluorescence quantum yield calculation.

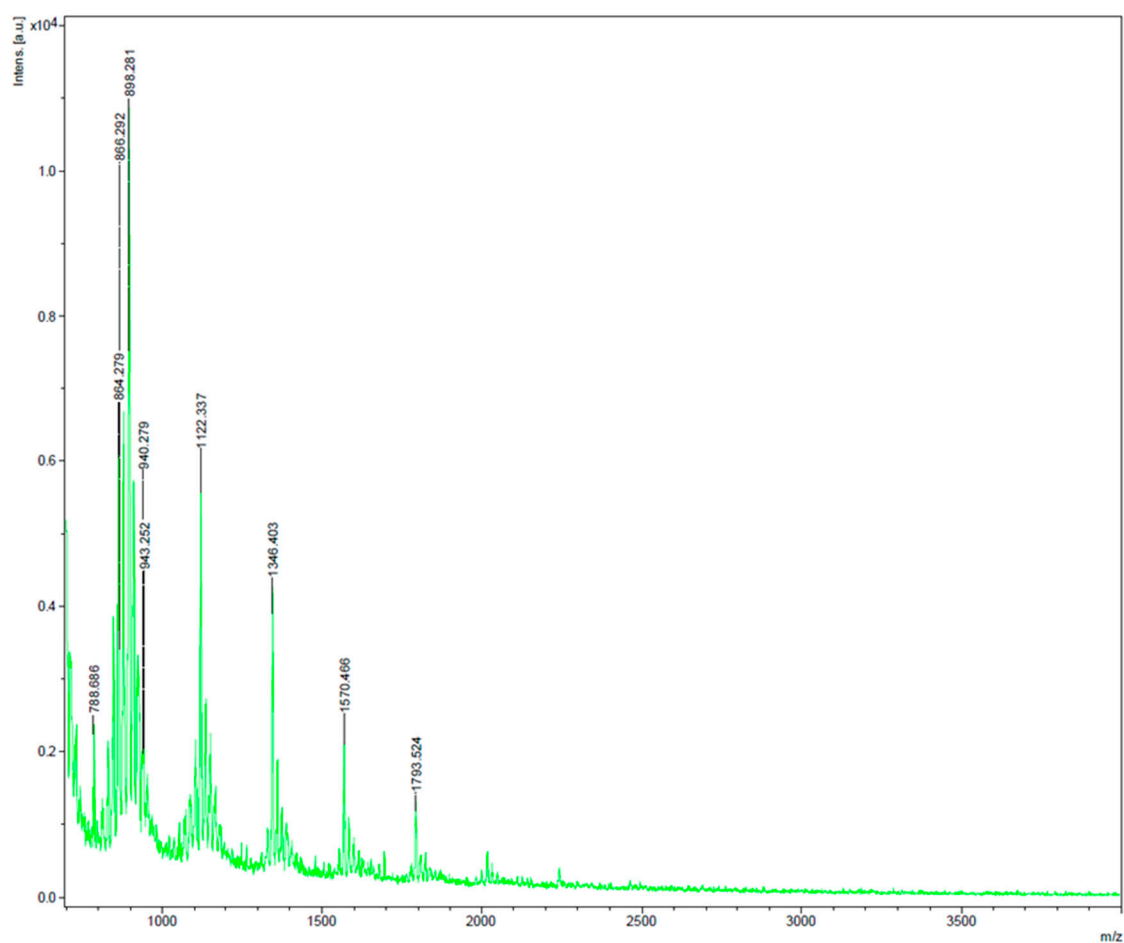

**Figure S2.** Matrix-assisted laser desorption/ionization time of flight mass spectroscopy (MALDI-TOF-MS) was used to determine the average molecular weight ( $M_w$ ) of BPLP. Average  $M_w$  calculated from the mass spectrum of BPLP is 1044 g/mol. For the analysis, the sample was spotted in a MALDI plate with 1, 8, 9-Antracenetriol (Ditranol) and analyzed using a mass spectrometer (Bruker Daltonics Ultraflex TOF/TOF) in reflectron mode.

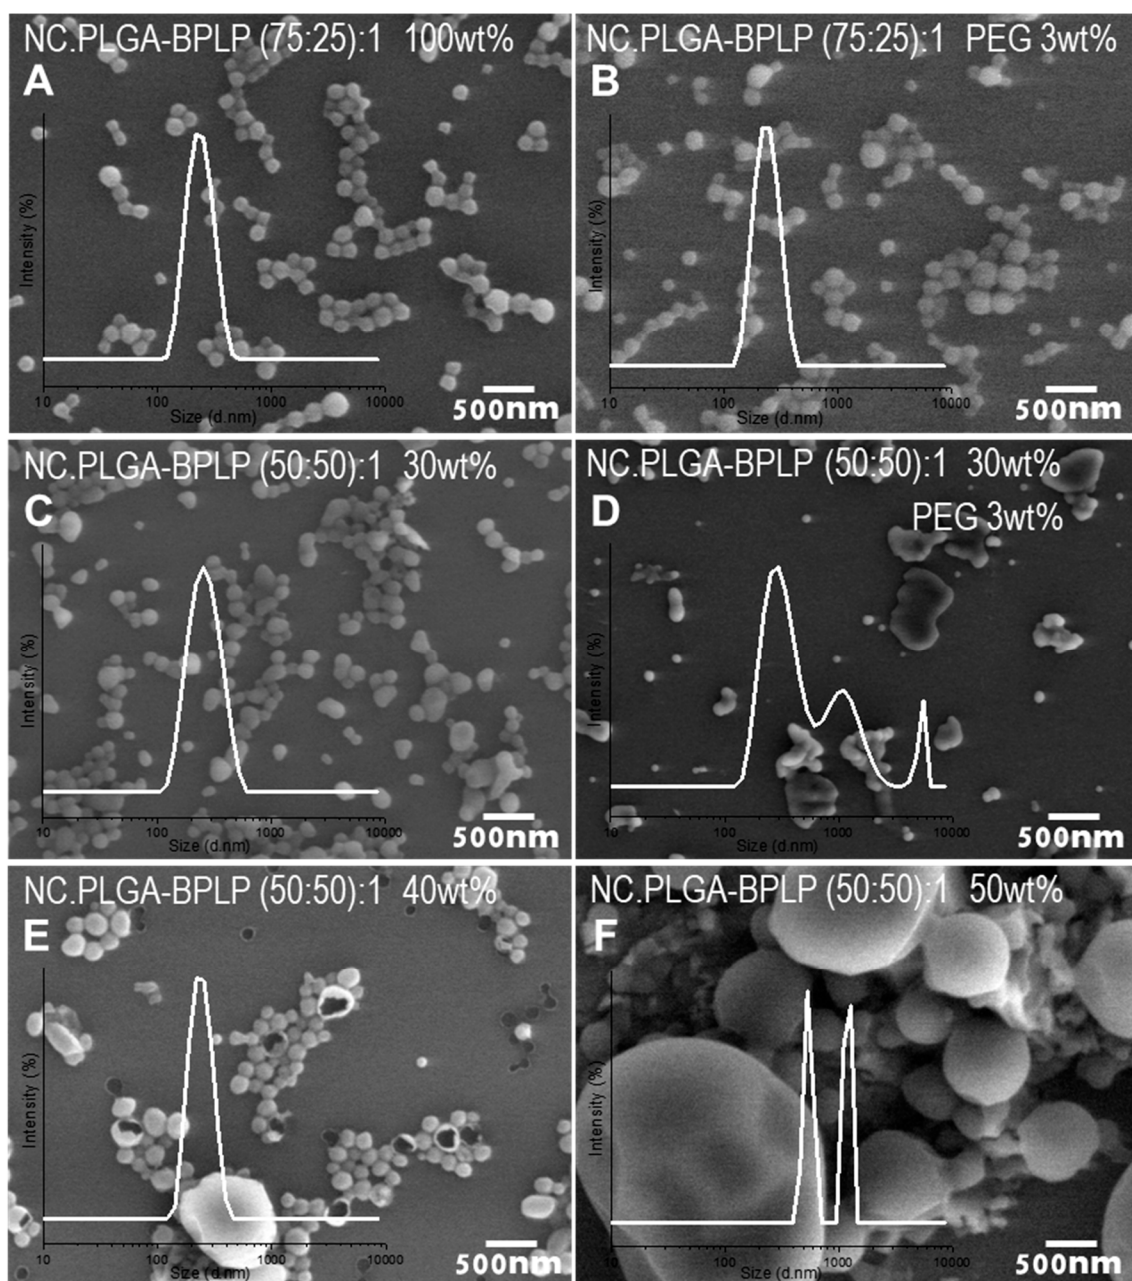

**Figure S3.** SEM images and DLS size distributions of NCs fabricated by different types of PLGA-BPLP.

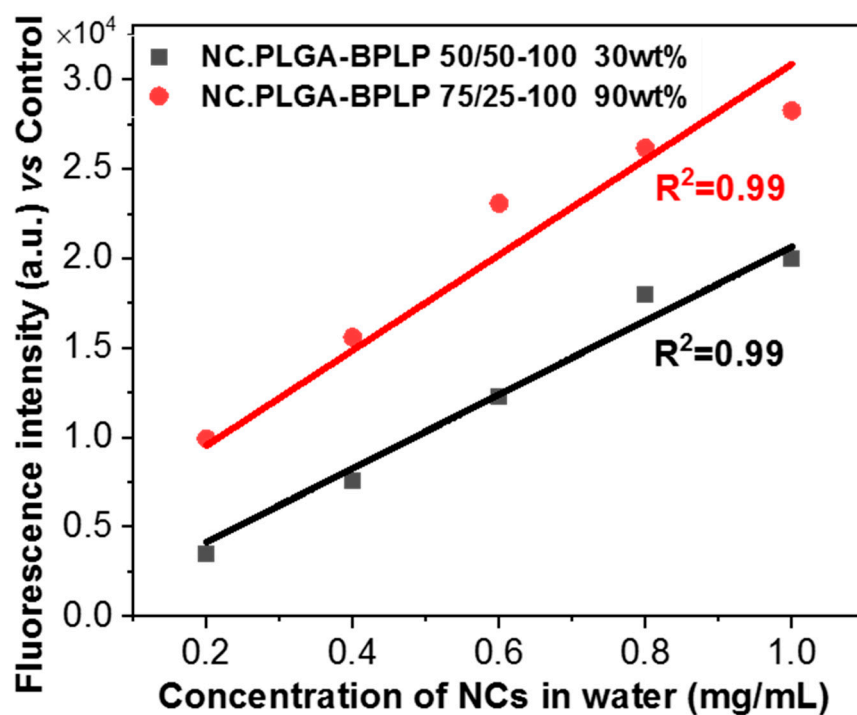

**Figure S4.** Fluorescence intensity of different concentrations of NCs measured by microplate reader at the maximal emission wavelengths (values have subtracted values of control non-fluorescence NCs).

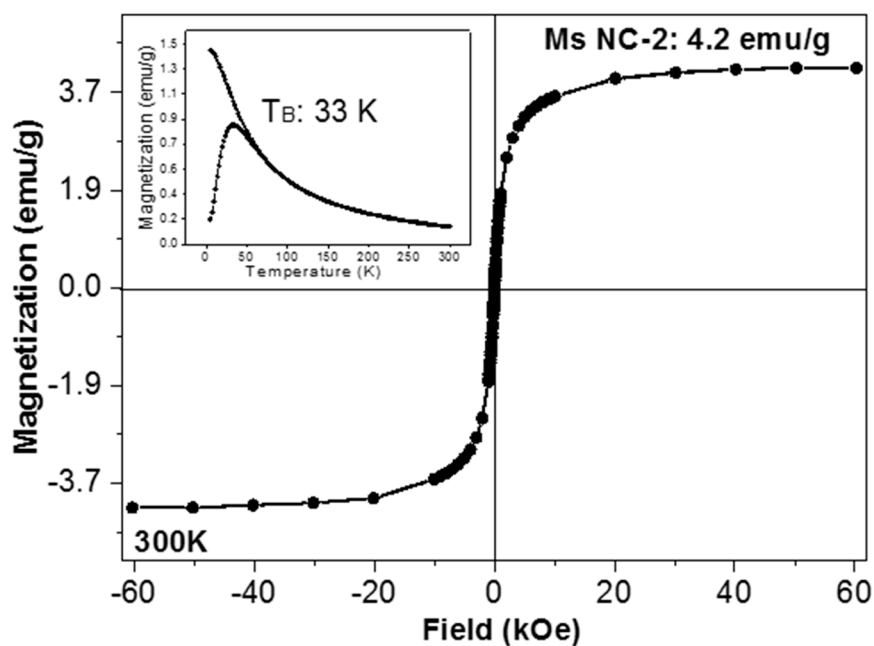

**Figure S5.** Hysteresis loop (300 K) and ZFC-FC (inset) measurements of the lyophilized nanocapsule batch NC2.
